# Supplementary material
Source: PubMed Central journal article supplement (PMC8788665)
Supplement: aem.01964-21-s0001.pdf [file aem.01964-21-s0001.pdf]

1  
2  
3  
4  
5  
6  
7  
8  
9  
10  
11  
12  
13  
14  
15  
16  
17

## Supplementary Materials for

### A superefficient ochratoxin A hydrolase with promising

### potential for industrial applications

Han Luo<sup>a¶</sup>, Gan wang<sup>b¶</sup>, Nan Chen<sup>a¶</sup>, Zemin Fang<sup>c</sup>, Yazhong Xiao<sup>c</sup>, Min Zhang<sup>b</sup>,  
Khishigjargal Gerelt<sup>a</sup>, Yingying Qian<sup>a</sup>, Ren Lai<sup>b\*</sup>, Yu Zhou<sup>a\*</sup>

<sup>a</sup> State Key Laboratory of Tea Biology and Utilization, School of Tea and Food  
Science Technology, Anhui Agricultural University, Hefei 230036, China

<sup>b</sup> Key Laboratory of Animal Models and Human Disease Mechanisms of Chinese  
Academy of Sciences/Key Laboratory of Bioactive Peptides of Yunnan Province,  
KIZ-CUHK Joint Laboratory of Bioresources and Molecular Research in Common  
Diseases, Sino-African Joint Research Center, Center for Biosafety Mega-Science,  
Kunming Institute of Zoology, Kunming 650223, Yunnan, China;

<sup>c</sup>School of Life Sciences, Anhui University, 230601 Hefei, Anhui, China

<sup>¶</sup>These authors contributed equally to this work (HL purified and characterized the  
enzyme ADH3, GW illustrated the efficient catalytic mechanism, and NC isolated the  
strain CW117 and screened the enzyme ADH3).

\*Correspondence Authors: [microbes@ahau.edu.cn](mailto:microbes@ahau.edu.cn) (YZ); [rlai@mail.kiz.ac.cn](mailto:rlai@mail.kiz.ac.cn) (RL)

18 **Supplementary Text:**

19 **Text S1 genomic analysis**

20 Based on OTA degradation product by *S. acidaminiphila* CW117, amido bond  
21 hydrolases are considered as the degradation enzymes (1, 2). Currently, few known  
22 examples of hydrolases, such as peptidase, amidohydrolase and carboxypeptidase  
23 were characterized as OTA degradation enzyme (3-6). In order to obtain the OTA  
24 degradation genes from the strain CW117, we assembled and analyzed the complete  
25 genome sequence of *S. acidaminiphila* CW117, and the general genomic information  
26 was outlined in Table S1-Table S3. After genomic data assemble, gene prediction and  
27 annotation were performed by BLAST searches in 10 databases (Fig.S2 – Fig.S3).  
28 More than 3800 genes were annotated by the database of COG, KEGG, NR, Pfam and  
29 Swissprot, and a complete genome map of *S. acidaminiphila* CW117 was produced by  
30 assembled and annotation results (Fig.S4). By genome sequence analysis, 53 amido  
31 bond hydrolase including 5 amidases, 14 amidohydrolases, 5 carboxypeptidases and  
32 29 peptidases' family (Table S4) were screened from complete genome sequence of  
33 CP062156.1 (*S. acidaminiphila* CW117).

34

36 **Table S1 Results for genome sequencing on the *S. acidaminiphila* CW117**

37

38

| Type            | Illumina | PacBio |
|-----------------|----------|--------|
| RawReads        | 9463494  | 307993 |
| RawBases        | 1.4 G    | 3.7 G  |
| CleanReads      | 9279424  | 221027 |
| CleanBases      | 1.3 G    | 2.7 G  |
| Meanlength (bp) | -        | 12375  |
| N50 (bp)        | -        | 12616  |

39

40

**Table S2 Genome assembly, ORF determination and basal information on the *S.***

41

***acidaminiphila* CW117.**

| Type             | Number/character | Average length (or Percentage in genome) | Total length |
|------------------|------------------|------------------------------------------|--------------|
| Contigs/Genome   | 1 (Circular)     | 4090129 bp                               | 4090129 bp   |
| Gene             | 3844             | 954.38 bp (89.7%)                        | 3668652 bp   |
| G+C (%)          | -                | 68.75                                    | -            |
| sRNA             | 11               | 144.182 bp                               | 1586         |
| 23S rRNA         | 3                | 2875 bp                                  | 8625         |
| 16S rRNA         | 3                | 1534 bp                                  | 4602         |
| 5S rRNA          | 3                | 114 bp                                   | 342          |
| tRNA             | 61               | 77.541 bp                                | 4730         |
| SINEs            | 14               | 0.02%                                    | 912 bp       |
| LINEs            | 6                | 0.01%                                    | 500 bp       |
| DNA transposon   | 5                | 0.01%                                    | 342 bp       |
| Tandem repeats   | 234              | 0.42%                                    | 17229 bp     |
| Num. of Prophage | 2                | 68681.5                                  | 137363 bp    |
| Num. of CRISPR   | 2                | 984 bp                                   | 1968 bp      |
| LTR elements     | 0                | 0%                                       |              |
| Unclassified     | 0                | 0%                                       | 0            |

42

43

44

45 **Table S3** The genomics island (GIs) predictions in the *S. acidaminiphila* CW117

46 **genome.**

| GIs number | Start position | End position | GI length |
|------------|----------------|--------------|-----------|
| GI1        | 135821         | 145627       | 9807 bp   |
| GI2        | 167433         | 205407       | 37975 bp  |
| GI3        | 361511         | 371271       | 9761 bp   |
| GI4        | 639600         | 643913       | 4314 bp   |
| GI5        | 1468321        | 1482892      | 14572 bp  |
| GI6        | 1493582        | 1503040      | 9459 bp   |
| GI7        | 1545600        | 1558567      | 12968 bp  |

47

48

49 **Table S4. The candidates of OTA degradation gene screened from the *S.***  
 50 ***acidaminiphila* strain CW117 genome (53 candidates).**

| Gene no.     | enzyme                              | Gene locus tag  | Expression primers                                                                   |
|--------------|-------------------------------------|-----------------|--------------------------------------------------------------------------------------|
| <i>cp1</i>   | Dipeptidyl carboxypeptidase II      | H7691_1749<br>0 | F:CCG <b>GAATTC</b> ATGTCGCGCACCCCTCATT<br>R:CCG <b>CTCGAGT</b> TACTTCAGCCCCGCGGTTTC |
| <i>cp2</i>   | LD-carboxypeptidase                 | H7691_0588<br>5 | F:CCG <b>GAATTC</b> ATGGACAGGCGGCGATT<br>R:CCG <b>CTCGAGT</b> CAGCTGCCGGCGAACAC      |
| <i>cp4</i>   | D-alanyl-D-alanine carboxypeptidase | H7691_0291<br>0 | F:CGC <b>GGATCC</b> ATGAAATTCGCTTTGCCG<br>R:CCG <b>CTCGAGT</b> CAGGACTTCCACCACATC    |
| <i>cp5</i>   | D-alanyl-D-alanine carboxypeptidase | H7691_1363<br>5 | F:CCG <b>GAATTC</b> ATGCCCAAGCTACCCG<br>R:CCG <b>CTCGAGT</b> CAGGCAGGCGTGCCGC        |
| <i>cpm14</i> | Metalloproteinase M14               | H7691_0593<br>0 | F:CCG <b>GAATTC</b> ATGACCACCGCTTCTATCC<br>R:CCG <b>CTCGAGT</b> CAGCGGTGCGCCAGCG     |
| <i>ad1</i>   | amidase                             | H7691_0386<br>5 | F:CGC <b>GGATCC</b> ATGCGCGCCCTCCACACC<br>R:CCG <b>CTCGAGT</b> CAACGGGTCTGCGCGGTAT   |
| <i>ad2</i>   | N-acetylmuramoyl-L-alanine amidase  | H7691_1304<br>5 | F:CGC <b>GGATCC</b> ATGCCCGCGATCCACATC<br>R:CCG <b>CTCGAGT</b> TACATGCGCTGCAGGGGT    |
| <i>ad3</i>   | N-acetylmuramoyl-L-alanine amidase  | H7691_0130<br>0 | F:CGC <b>GGATCC</b> ATGAAGATGTCCACCAAGC<br>R:CCG <b>CTCGAGT</b> CAGCGGTGGGTGGCC      |
| <i>ad4</i>   | N-acetylmuramoyl-L-alanine amidase  | H7691_0128<br>5 | F:CCG <b>GAATTC</b> ATGACGCATCGGAAAACCC<br>R:CCG <b>CTCGAGT</b> TACGGCGTATCGGTCTGTG  |
| <i>ad5</i>   | N-acetylmuramoyl-L-alanine amidase  | H7691_0854<br>5 | F:CCG <b>GAATTC</b> ATGCTCAAGGGAAGCCGCC<br>R:CCG <b>CTCGAGT</b> TACGGCGTATCGGTCTGTG  |
| <i>adh1</i>  | Amidohydrolase                      | H7691_0886<br>5 | F:CCG <b>GAATTC</b> ATGAATGACCTCCGTATTTAC<br>R:CCG <b>CTCGAGT</b> CAGCCCAGGGTGAAGG   |
| <i>adh2</i>  | Amidohydrolase                      | H7691_0319<br>5 | F:CCG <b>GAATTC</b> ATGAGCGCGTCCATCGTGT<br>R:CCG <b>CTCGAGT</b> CAGCGCGGTAGGCCG      |
| <i>adh3</i>  | Amidohydrolase                      | H7691_1293<br>5 | F:CGC <b>GGATCC</b> ATGCCGATCCGCCGCCG<br>R:CCG <b>CTCGAGT</b> CACTGCTTGTAGATCACCCCG  |
| <i>adh4</i>  | Amidohydrolase                      | H7691_0959<br>5 | F:CCG <b>GAATTC</b> ATGAACCCGCTGACCCGC<br>R:CCG <b>CTCGAGT</b> CAGGGGGCCACATTGCGT    |
| <i>adh5</i>  | Amidohydrolase                      | H7691_11440     | F:CCG <b>GAATTC</b> ATGAAAACACGCTCTGCCTC<br>R:CCG <b>CTCGAGT</b> CAGCGGGCGGCTTCGG    |
| <i>adh6</i>  | Amidohydrolase                      | H7691_0844<br>5 | F:CCG <b>GAATTC</b> ATGGGCGCGAGGCGGGC<br>R:CCG <b>CTCGAGT</b> CATCGCGACGAAGCGTTG     |
| <i>adh7</i>  | Amidohydrolase                      | H7691_1424<br>5 | F:CGC <b>GGATCC</b> ATGCGCCGTACCGCCGC<br>R:CCG <b>CTCGAGT</b> CAGCCCTCGCTGGCCG       |
| <i>adh8</i>  | Amidohydrolase                      | H7691_1354<br>5 | F:CGC <b>GGATCC</b> ATGAACTGCTGTTGGCCC<br>R:CCG <b>GAATTC</b> TATTTCCCGCTTGCTCC      |
| <i>adh9</i>  | Amidohydrolase                      | H7691_0844<br>0 | F:CGC <b>GGATCC</b> ATGAACATGAACCCCGC<br>R:CCG <b>CTCGAGT</b> CAGTAGAAGCCCACGTTG     |
| <i>adh10</i> | Amidohydrolase                      | H7691_0320<br>0 | F:CCG <b>GAATTC</b> ATGCGACACCGACTGCTG<br>R:CCG <b>CTCGAGT</b> CATGGCCGCACCTCCTG     |
| <i>adh11</i> | Amidohydrolase                      | H7691_0343<br>0 | F:CCG <b>GAATTC</b> ATGAGCCGGCTCGACAAC<br>R:CCG <b>CTCGAGT</b> CTAGCCGAGCTGCAGC      |
| <i>adh12</i> | Amidohydrolase                      | H7691_0589<br>0 | F:CCG <b>GAATTC</b> ATGCGCCCGCTGTGCTTG<br>R:CCG <b>CTCGAGT</b> CAGTCGGCGCCCTTG       |
| <i>adh13</i> | Amidohydrolase                      | H7691_11430     | F:CCG <b>GAATTC</b> ATGTTTCGACCACCTGTTAC<br>R:CCG <b>CTCGAGT</b> CAGGACGCGGTTGCGTC   |
| <i>naa</i>   | amidohydrolase                      | H7691_0135<br>5 | F:CGC <b>GGATCC</b> ATGATCCGCAAGACCGTTCTGT<br>R:CCG <b>CTCGAGT</b> CAGCCGGCGCCGCCGT  |
| <i>pd1</i>   | peptidase                           | H7691_0307<br>0 | F:CCG <b>GAATTC</b> ATGGCGGTGGCGGTGTG<br>R:CCG <b>CTCGAGT</b> CAAGGGAACCTGGCCCC      |
| <i>pd2</i>   | peptidase                           | H7691_1275<br>5 | F:CGC <b>GGATCC</b> ATGAAGAACGCCACCGG<br>R:CCG <b>CTCGAGT</b> TACCAGATCACTACCTGC     |

|               |                                             |                 |                                                                                      |
|---------------|---------------------------------------------|-----------------|--------------------------------------------------------------------------------------|
| <i>pd3</i>    | peptidase                                   | H7691_0371<br>0 | F:CCG <b>GAATTC</b> ATGTTGCGAGCAGTGGG<br>R:CCG <b>CTCGAGT</b> CATTCCGGGTCGGCCC       |
| <i>pds8</i>   | peptidase S8                                | H7691_0586<br>5 | F:CCG <b>GAATTC</b> ATGCGCAGCACGTTCAAGG<br>R:CCG <b>CTCGAGT</b> CAGAACCCCGCATGAAC    |
| <i>pds9</i>   | peptidase S9                                | H7691_0063<br>0 | F:CCG <b>GAATTC</b> ATGGGAAGGGGATGGTG<br>R:CCG <b>CTCGAGT</b> CAGTCCCGATGTGCTC       |
| <i>pds10</i>  | peptidase S10                               | H7691_0706<br>5 | F:CCG <b>GAATTC</b> ATGAAACACCTGCTGTACGT<br>R:CCG <b>CTCGAGT</b> CAGTTGCGCTGGTACATG  |
| <i>pds41</i>  | peptidase S41                               | H7691_01105     | F:CCG <b>GAATTC</b> ATGCGTGTAGCCGGCCTT<br>R:CCG <b>CTCGAGT</b> CACTTGCCGCCGTCGAC     |
| <i>pds46</i>  | peptidase S46                               | H7691_1837<br>0 | F:CCG <b>GAATTC</b> ATGAAGCGCACACCGCT<br>R:CCG <b>CTCGAGT</b> TACTCCCAGCGGACGGC      |
| <i>pds49</i>  | peptidase S49                               | H7691_11860     | F:CGC <b>GGATCC</b> ATGACCCTGTTACCGCATATG<br>R:CCG <b>GAATTC</b> CACTTCTCCTGTCCGGC   |
| <i>c-pds</i>  | carboxy<br>terminal-processing<br>peptidase | H7691_0294<br>0 | F:CCG <b>GAATTC</b> ATGAACTACCGAGTACCCG<br>R:CCG <b>CTCGAGT</b> CAGTCGGCCCAGCGG      |
| <i>mepds</i>  | metalloendopeptidase                        | H7691_0866<br>0 | F:CCG <b>GAATTC</b> ATGCGCTCGATGCTCCTG<br>R:CCG <b>CTCGAGT</b> ACTTGCCGCGTTCGAG      |
| <i>pdm1</i>   | M1 family<br>metallopeptidase               | H7691_0285<br>0 | F:CGC <b>GGATCC</b> ATGCGTTCACCCCTCCTG<br>R:CCG <b>GAATTC</b> TACGGCTTCGGCGCGG       |
| <i>pdm2</i>   | M2 family<br>metallopeptidase               | H7691_1372<br>0 | F:CGC <b>GGATCC</b> ATGTACCCGAAATGACCTC<br>R:CCG <b>GAATTC</b> TACGGCGCGGCCGCT       |
| <i>pdm3</i>   | M3 family<br>metallopeptidase               | H7691_0931<br>5 | F:CGC <b>GGATCC</b> ATGGCTTTGCAACAGCAGGGC<br>R:CCG <b>CTCGAGT</b> TACTTGCTTTCGGCGCCG |
| <i>pdm13</i>  | peptidase M13                               | H7691_0529<br>5 | F:CCG <b>GAATTC</b> ATGACCCTTTCCAAGCTCG<br>R:CCG <b>CTCGAGT</b> TACCAGATGACCACGCG    |
| <i>pdm15</i>  | M15 family<br>metallopeptidase              | H7691_0131<br>0 | F:CCG <b>GAATTC</b> ATGCGCAGAGCCATTGCC<br>R:CCG <b>CTCGAGT</b> AGCGCACCCGGGAAGTC     |
| <i>pdm20</i>  | peptidase M20                               | H7691_1445<br>0 | F:CCG <b>GAATTC</b> ATGGACAGCGCCAAGTCTC<br>R:CCG <b>CTCGAGT</b> CAGCAGCAGCCGTGGC     |
| <i>pdm23</i>  | peptidase M23                               | H7691_1404<br>0 | F:CCG <b>GAATTC</b> ATGCACCCTGACGCTC<br>R:CCG <b>CTCGAGT</b> CAGGGCGGGGCGCCC         |
| <i>pdm28</i>  | peptidase M28                               | H7691_1469<br>5 | F:CCG <b>GAATTC</b> ATGCGCCGCTCACCTTC<br>R:CCG <b>CTCGAGT</b> CATTCTTGGGCGGCAC       |
| <i>pdm48</i>  | peptidase M48                               | H7691_04110     | F:CCG <b>GAATTC</b> ATGATGCTGCGGAACTG<br>R:CCG <b>CTCGAGT</b> CAGCGGCGCTGCATGT       |
| <i>pdm61</i>  | peptidase M61                               | H7691_0040<br>0 | F:CCG <b>GAATTC</b> ATGTACGCGCACAAAGTGGT<br>R:CCG <b>CTCGAGT</b> CAACGCCCGGCGCG      |
| <i>pdcl3</i>  | peptidase C13                               | H7691_1049<br>0 | F:CGC <b>GGATCC</b> ATGCCTGCCGCCATCAC<br>R:CCG <b>GAATTC</b> TACGCGGTCCCGGGG         |
| <i>pdcl40</i> | peptidase C40                               | H7691_1279<br>5 | F:CGC <b>GGATCC</b> ATGCACATCACGCCAGCT<br>R:CCG <b>GAATTC</b> TACGCGCAGCACGCGCTT     |
| <i>pdp1</i>   | peptidase P1                                | H7691_0517<br>0 | F:CCG <b>GAATTC</b> ATGATCAAGCGCTGGTCCC<br>R:CCG <b>CTCGAGT</b> CAGCGTGGCGCCGGC      |
| <i>pdu32</i>  | peptidase U32                               | H7691_0272<br>5 | F:CCG <b>GAATTC</b> ATGAAGATCAGCCTTGCC<br>R:CCG <b>CTCGAGT</b> CAGGCCCTGCATGCGCAT    |
| <i>dpl-1</i>  | dipeptidase                                 | H7691_1878<br>0 | F:CGC <b>GGATCC</b> ATGCCGCTGTGTCTGTCTG<br>R:CCG <b>GAATTC</b> TACTTGGCGCCGTCTTC     |
| <i>dpl-2</i>  | dipeptidase                                 | H7691_1510<br>5 | F:CGC <b>GGATCC</b> ATGACCAATGGCCTGCTG<br>R:CCG <b>GAATTC</b> TACTCCAGCGCCGCTT       |
| <i>pdz</i>    | zinc-dependent peptidase                    | H7691_1722<br>5 | F:CGC <b>GGATCC</b> ATGGCACCGCCTGCTGC<br>R:CCG <b>CTCGAGT</b> ATGGCTGTTGACGCGC       |
| <i>m-hd</i>   | Metallo-hydrolase                           | H7691_0537<br>0 | F:CGC <b>GGATCC</b> ATGATCAAGCGGTGCTTGT<br>R:TCC <b>CCCGGGT</b> CAGTCTTCCAGCAGCGG    |

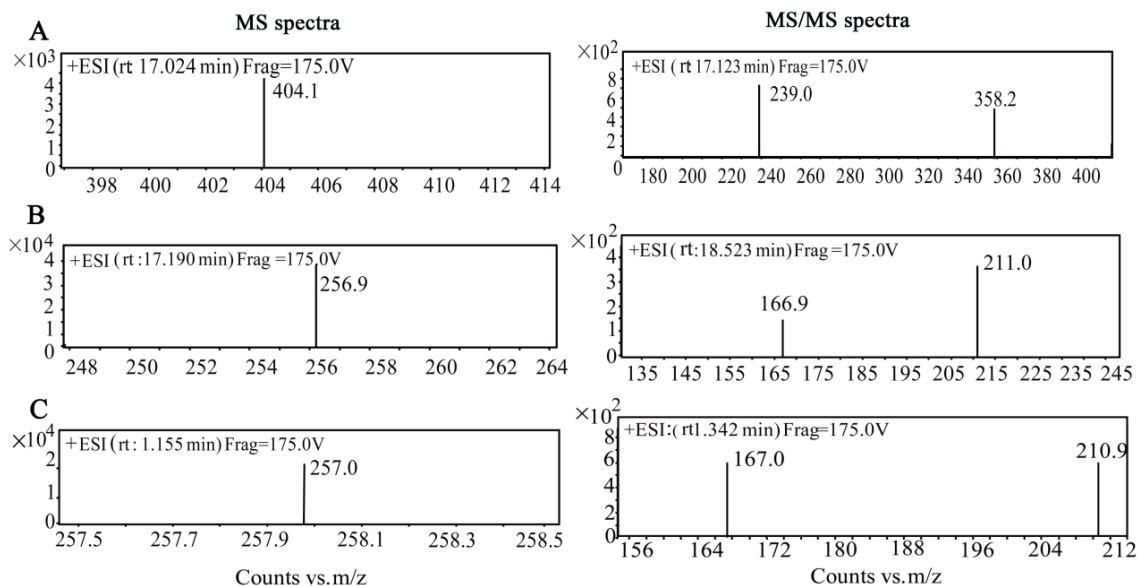

53  
54

55 **Figure S1. The liquid chromatography-tandem mass analysis of OTA**  
 56 **degradation product by the strain CW117 under the positive ionization mode. A,**  
 57 **the spectra of OTA standard; B, the spectra of OT $\alpha$  standard; C, the spectra of OTA**  
 58 **degradation product. The OTA standard produced [M+H<sup>+</sup>] at m/z 404 as precursor ion**  
 59 **in MS spectrum, and product ions at m/z 239 and 358 in MS/MS spectrum. The OT $\alpha$**   
 60 **standard produced [M+H<sup>+</sup>] at m/z 256.9 as precursor ion in MS spectrum, and product**  
 61 **ions at m/z 167 and 211 as in MS/MS spectrum.**



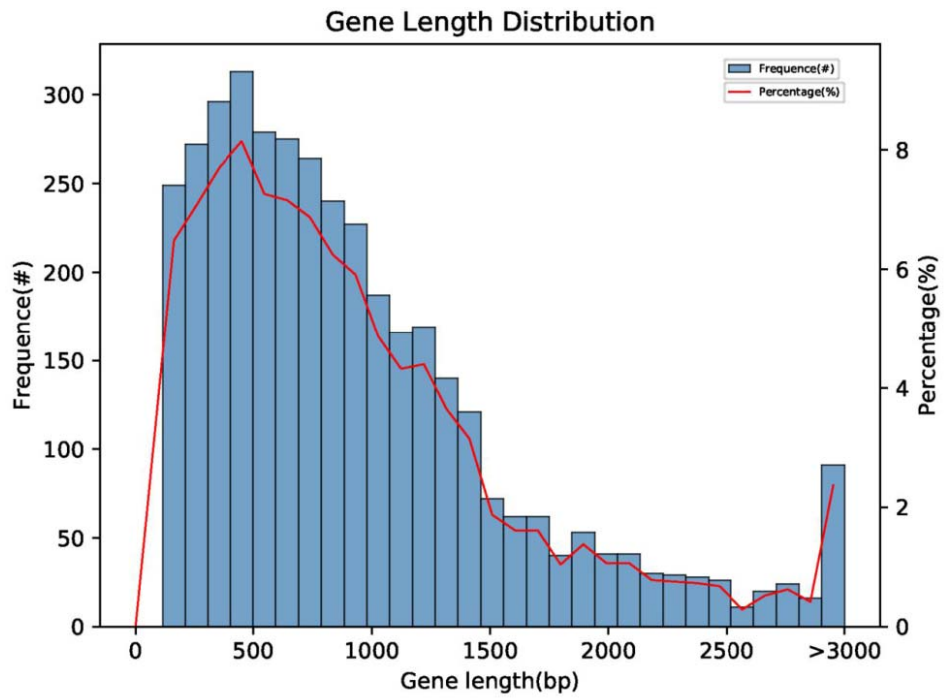

62

63 **Figure S2. The gene length distribution of CW117 genome.** The gene length of

64 CW117 was mainly distributed in the range of 100 - 1500 bp.

65

66

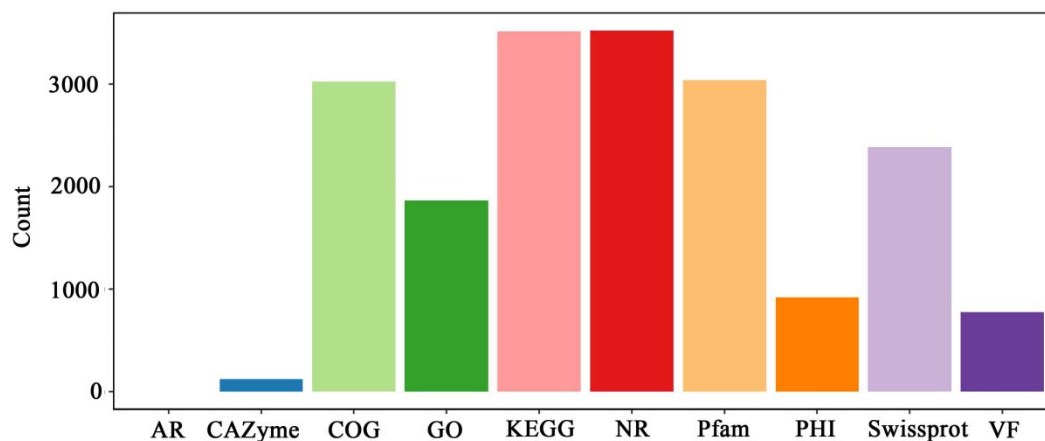

67

68 **Figure S3. The statistics of gene annotation in different database.** NR,  
69 Non-Redundant Protein Database; Swiss-prot, Swiss-prot Database; COG, Cluster of  
70 Orthologous Group of Proteins; KEGG, Kyoto Encyclopedia of Genes and Genomes;  
71 GO, Gene Ontology; Pfam, Pfam Database; CAZyme, Carbohydrate-Active enZymes  
72 Database; PHI, Pathogen Host Interactions; VF, Virulence Factors of Pathogenic  
73 Bacteria; AR, Antibiotic Resistance Genes Database.

74

75

76

77

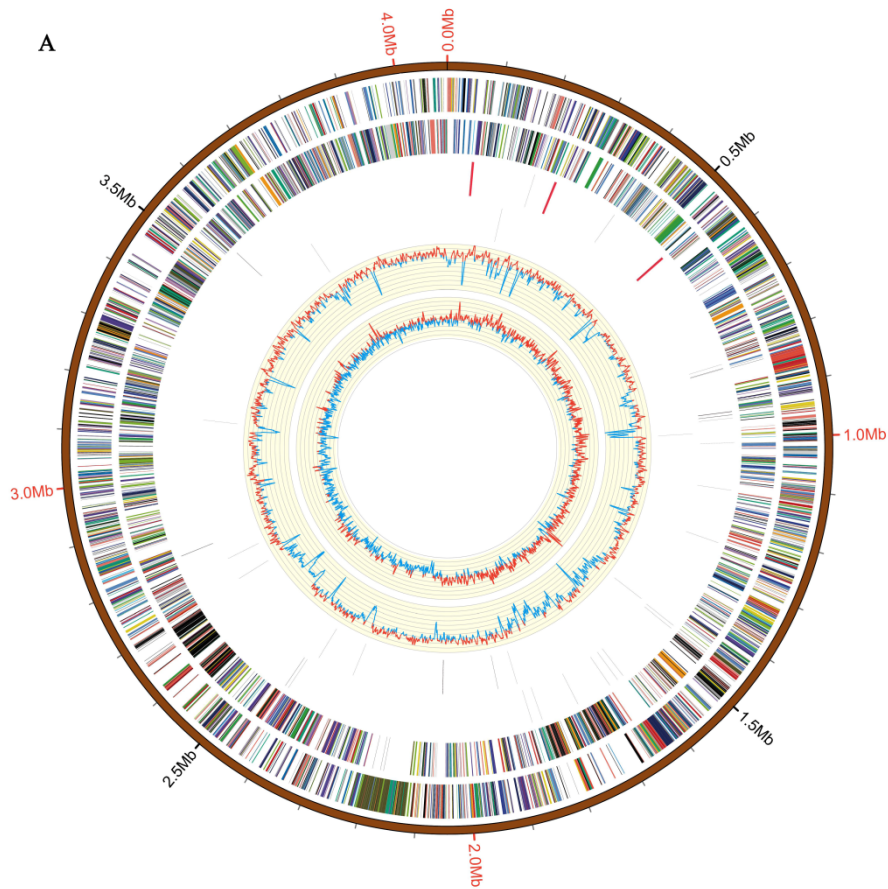

78

79 **Figure S4. The complete genome of *Stenotrophomonas acidaminiphila* CW117.**

80 Rings from the outside to inside 1) scale marks of the genome; 2) protein-coding

81 genes on the forward strand; 3) protein-coding genes on the reverse strand; 4) tRNA

82 (black) and rRNA (red) genes on the forward strand; 5) tRNA (black) and rRNA (red)

83 genes on the reverse strand; 6) GC content; 7) GC skew. Protein-coding genes are

84 color coded according to their COG categories.

85

```

AfOTase  IKAALETMPGYQI-----QTGIAQTGVKAVL-----KGGKPGPVVALRADMDALPVQERND ---117
ADH3     RVVDLDGDKVCLPG-----WTDLLVIVI-----LGSQSSP-QSYSEDFRLDPVDH--- ---106
OTase    ALVISDKIIAFVGSEADIPKKYLRSTQSTHRVPVLMPGLWDCHMHFGGDDDYNDYTSGLATHPASSG--- ---136
CP       IASMTKMMTEYLL-----LEAIQ-----EGKVKWDQYTPDDYVYEISQDN- ---106
PJ15_1540 PASMTKMMTSYII-----EQKLLK-----GELTENEQVRMNESAWCRGSSSSE ---97
CPA      FPSLQAVKVFLEA-----HGIRYR-----IMIEDVQSLLDEEQEQMFASQS- ---109

AfOTase  VVAAAETVVALNNIIAQRTNPQDGTTVVTVGSLQSGNRPNVLPESADISGTVR-----SLSKQNQATAH ---314
ADH3     IKAVVDTARDYGFRVAAHAHGTEGMKRAVQAGVTSIEHGTYMDDEVMRLMKQHGTWYVPTFYAGRFVTEK ---303
OTase    LKVIVEEAARQNRIVSAHVHGKAGIMAAIKAGCKSLEHVSYADEEVWELMKEKG-----ILYVATRSVIE ---334
CP       WNFMLKGLVSEYPGVDGLKTGSTDSAGSCFTSTAQRNGMRVITVVLNAKGNLHTG----RFDETKKMLDY ---304
PJ15_1540 --ALLYTDPS----VDGLKTGHTNEAGFCLTSSKRGPMRLISVIFGTPSMNER-----ANQTRTLLAW ---268
CPA      R-SVTSSSLCVGDANRNWDAGFGKAGASSSPCSETYHGKYANSEVEVKSIVD-----FVKDHGNFKAF ---302

AfOTase  ELIQRYAQNIAANHDLKATVRIDT--GYEVLVSDPKATQVIPALDLATDGIGAKEVAPGMG-SEDFGAF ---381
ADH3     AAIDGYFPEVVRPKAARIGALISQ--TAAKAYRNGVRIAFGTDQQVGPHGDNAREFVYMVE-AGIPAAY ---369
OTase    IFLASNGEGLVKESWAKLQALADSHLKAYQGAIKAGVTIALGTDT--APGGPTAELQFAVERGGMTPLE ---402
CP       AFNSNFSMKDLYPEGSQVKGHKTID-VEKGKDKQVDIVTDKALSIPVKSGDEKNYKAEVTLDKKEITAPV ---373
PJ15_1540 GFSN-FETANYQPANQVLAKAKVW---FGKQDDVQIGLAENFNVMPKGQADKIKTQLVVQ-PKLNAPL ---332
CPA      LSIHSYSQLLLYPYGYTTQSIPDK---TELNQVAKSAVEALKSLYGTSYKYGSIITTIYQASGGSIDWSY ---369

```

86

87 **Figure S5. Multiple sequences alignments of ADH3 and other OTA detoxify**

88 **enzymes with known polypeptide sequences.** The catalytic residues for ADH3 are

89 shown in *white* character with a *black* background. The result of multiple sequences

90 alignments showed that the sequences of the identified peptidases (detoxify enzymes)

91 responsible OTA detoxification showed high diversity, and ADH3 showed the closest

92 relative to OTase indentified from *Aspergillus niger*. The amino acid sequences used

93 in multiple sequences alignments were as follows: ADH3 (QOF97534.1), AfOTase

94 (OSZ37025.1), PJ15\_1540 (KHF78480.1), OTase (AIG55189.1), CP (AKA44618.1),

95 CPA (NP\_777175.1).

96

97  
98

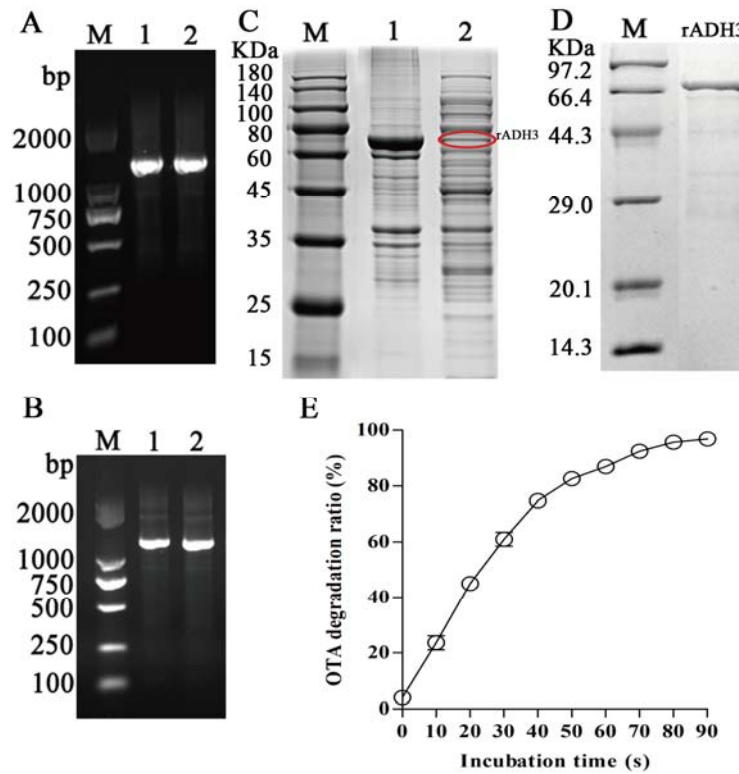

99

100 **Figure S6. Gene cloning, protein expression, purification and activity assay of**  
101 **ADH3.** A, the PCR product of gene *adh3* from the CW117 genome; B, The PCR  
102 verification of *gene adh3* from *E. coli* BL21 transformant pGEX-4T-1/*adh3*; C,  
103 SDS-PAGE analysis of the heterologous expressed rADH3 (M, marker; 1, the  
104 expressed rADH3 in precipitant; 2, the expressed rADH3 in supernatant); D,  
105 SDS-PAGE analysis of the purified rADH3 (M, marker; rADH3, the purified rADH3  
106 protein); E, OTA degradation assays on purified rADH3 by 1.2  $\mu\text{g}/\text{mL}$  active protein.

107

108 **Reference**

109

- 110 1. Stander MA, Steyn PS, van Der Westhuizen FH, Payne BE. 2001. A kinetic study into the  
111 hydrolysis of the ochratoxins and analogues by carboxypeptidase A. *Chem Res Toxicol*  
112 14:302-4.
- 113 2. Wu Q, Dohnal V, Huang L, Kuca K, Wang X, Chen G, Yuan Z. 2011. Metabolic pathways of  
114 ochratoxin A. *Curr Drug Metab* 12:1-10.
- 115 3. Chang X, Wu Z, Wu S, Dai Y, Sun C. 2015. Degradation of ochratoxin A by *Bacillus*  
116 *amyloliquefaciens* ASAG1. *Food Addit Contam Part A Chem Anal Control Expo Risk Assess*  
117 32:564-71.
- 118 4. Dobritzsch D, Wang H, Schneider G, Yu S. 2014. Structural and functional characterization of  
119 ochratoxinase, a novel mycotoxin-degrading enzyme. *Biochem J* 462:441-52.
- 120 5. Liuzzi VC, Fanelli F, Tristezza M, Haidukowski M, Picardi E, Manzari C, Lionetti C, Grieco F,  
121 Logrieco AF, Thon MR, Pesole G, Mule G. 2016. Transcriptional Analysis of *Acinetobacter* sp.  
122 *neg1* Capable of Degrading Ochratoxin A. *Front Microbiol* 7:2162.
- 123 6. Zhang H, Zhang Y, Yin T, Wang J, Zhang X. 2019. Heterologous Expression and  
124 Characterization of A Novel Ochratoxin A Degrading Enzyme, N-acyl-L-amino Acid  
125 Amidohydrolase, from *Alcaligenes faecalis*. *Toxins (Basel)* 11.

126
